# Supplementary material
Source: Springer Nature journal article supplement (https://www.springermedizin.de/resource/supplementary/12891_2014_2396_MOESM6_ESM.pdf/9510106)

**A**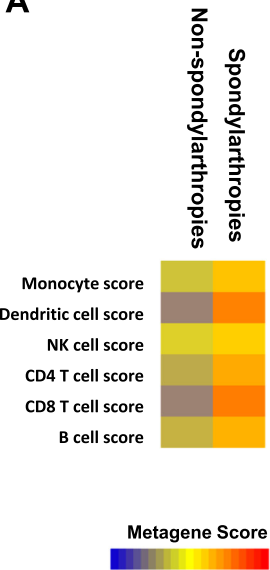**B**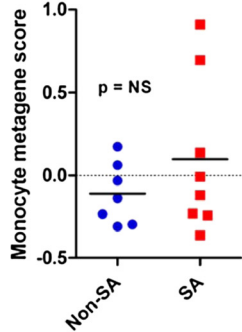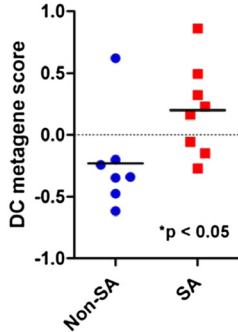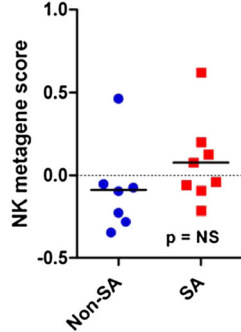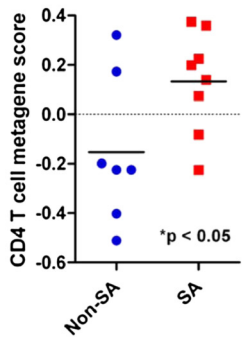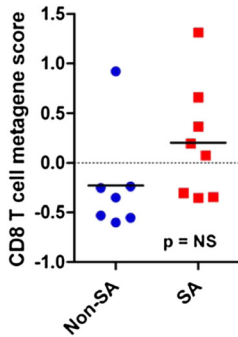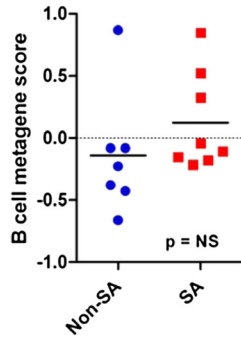

Supplement: MOESM6 [file 9510106]
